# Supplementary material
Source: HighWire-hosted journal article supplement (https://www.annfammed.org/highwire/filestream/7946/field_highwire_adjunct_files/0/Gaynes_Appendix.pdf)
Supplement: Gaynes_Appendix.pdf [file Gaynes_Appendix.pdf]

**Online Supplementary Material**

Gaynes BN, Rush A, Trivedi M, et al. Major depression symptoms in primary care and psychiatric care settings: a cross-sectional analysis. *Ann Fam Med.* 2007;5(2):126-134.

<http://www.annfammed.org/cgi/content/full/5/2/126/DC1>

| <b>Supplemental Table. Percentage of Patients With Specific Depressive Symptoms (IDS-C30 by ROA)</b> |                                               |                                                 |                           |                          |
|------------------------------------------------------------------------------------------------------|-----------------------------------------------|-------------------------------------------------|---------------------------|--------------------------|
| <b>Selected IDS-C30 (ROA) Items</b>                                                                  | <b>Recruitment Setting</b>                    |                                                 | <b>Unadjusted P Value</b> | <b>Adjusted P Value*</b> |
|                                                                                                      | <b>Primary Care<br/>n = 1,063<br/>(41.8%)</b> | <b>Specialty Care<br/>n = 1,478<br/>(58.2%)</b> |                           |                          |
| <b>Essential features</b>                                                                            |                                               |                                                 |                           |                          |
| Depressed mood (sad)                                                                                 | 96.6                                          | 97.9                                            | .0486                     | .0531                    |
| Anhedonia: involvement (interest in activities)                                                      | 80.6                                          | 85.7                                            | .0015                     | .0025                    |
| <b>Core features</b>                                                                                 |                                               |                                                 |                           |                          |
| <b>Appetite/weight change</b>                                                                        |                                               |                                                 |                           |                          |
| Appetite decreased                                                                                   | 42.7                                          | 44.3                                            | .4524                     | .4992                    |
| Appetite increased                                                                                   | 23.3                                          | 19.8                                            | .0475                     | .2556                    |
| Weight decrease                                                                                      | 29.2                                          | 29.3                                            | .9740                     | .9245                    |
| Weight increase                                                                                      | 25.0                                          | 22.3                                            | .1278                     | .6157                    |
| <b>Sleep disturbance</b>                                                                             |                                               |                                                 |                           |                          |
| Sleep onset insomnia                                                                                 | 67.1                                          | 66.8                                            | .9029                     | .5168                    |
| Mid-nocturnal insomnia                                                                               | 83.0                                          | 77.2                                            | .0008                     | .5547                    |
| Early morning insomnia                                                                               | 52.4                                          | 50.3                                            | .3234                     | .0806                    |
| Hypersomnia                                                                                          | 21.3                                          | 26.6                                            | .0045                     | .7476                    |
| <b>Psychomotor change</b>                                                                            |                                               |                                                 |                           |                          |
| Slowing                                                                                              | 62.1                                          | 61.8                                            | .8845                     | .4531                    |
| Agitation                                                                                            | 60.7                                          | 64.5                                            | .0682                     | .0188                    |
| <b>Fatigue/loss of energy (energy/fatigability)</b>                                                  |                                               |                                                 |                           |                          |
| Fatigue/loss of energy (energy/fatigability)                                                         | 89.9                                          | 88.4                                            | .2723                     | .9027                    |
| <b>Worthless/guilt (outlook-self)</b>                                                                |                                               |                                                 |                           |                          |
| Worthless/guilt (outlook-self)                                                                       | 76.6                                          | 82.5                                            | .0006                     | .0755                    |
| <b>Decreased concentration (concentration/decision making)</b>                                       |                                               |                                                 |                           |                          |
| Decreased concentration (concentration/decision making)                                              | 88.5                                          | 91.8                                            | .0087                     | .0084                    |
| <b>Suicidal ideation</b>                                                                             |                                               |                                                 |                           |                          |
| Suicidal ideation                                                                                    | 42.8                                          | 51.4                                            | <.0001                    | <.0001                   |

Note: Percentage for which the symptom was rated as present (> 1 on the item).  
 IDS-C30 = 30-item Inventory of Depressive Symptomatology, Clinician Rating; ROA = research outcome assessor.  
 \*Adjusted for age, sex, education, employment status, marital status, ethnicity, length of current episode, and Cumulative Illness Rating Scale (total score).
